# Supplementary material for: Correlation between Findings in Physical Examination, Magnetic Resonance Imaging, and Nerve Conduction Studies in Lumbosacral Radiculopathy Caused by Lumbar Intervertebral Disc Herniation
Source: Adv Orthop. 2020 Jan 24;2020:9719813. doi: 10.1155/2020/9719813 (PMC7008266; doi:10.1155/2020/9719813)
Supplement: Supplementary Materials — Demographic data of the patient group, history, physical examination, MRI findings, and interpretation of NCS findings. [file 9719813.f1.xlsx]

## Sheet: Sheet1
no	age	sex	height	weight	dutration in months	side	dermatome	L5 sensation	S1 sensation	gait	ankle jerk	SLR test	CP a	CP v	T a	T v	F-CP aff	F-CP non	F-T aff	F-T non	H aff	H non	MRI level	L4/5	L5/S1	MRI root comp. L4/5 aff	MRI root comp. L4/5 non	MRI root comp. L5/S1 aff	MRI root comp. L5/S1 non
1	52	male	175	60	4	left	L5	impaired	normal	listing	normal	positive	normal	normal	normal	decreased	prolonged	normal	normal	normal	prolonged	prolonged	L4/5	paracentral	no herniation	compression	no compression	no herniation	no herniation
2	48	male	168	64	24	right	S1	normal	impaired	antalgic	absent	positive	normal	normal	normal	normal	normal	absent	normal	normal	prolonged	prolonged	L4/5 & L5/S1	central	paracentral	no compression	no compression	no compression	no compression
3	59	female	168	61	3	left	S1	normal	impaired	antalgic	normal	positive	normal	normal	reduced	decreased	normal	normal	normal	normal	prolonged	prolonged	L4/5 & L5/S1	paracentral	paracentral	compression	no compression	compression	no compression
4	32	male	188	72	48	left	S1	normal	impaired	listing	normal	positive	reduced	normal	normal	normal	prolonged	normal	normal	normal	normal	normal	L4/5 & L5/S1	paracentral	paracentral	no compression	no compression	compression	no compression
5	60	male	181	63	48	left	S1	normal	impaired	normal	absent	negative	normal	normal	normal	normal	prolonged	absent	prolonged	prolonged	prolonged	prolonged	L5/S1	no herniation	paracentral	no herniation	no herniation	compression	no compression
6	41	male	176	58	36	right	L5	impaired	normal	listing	normal	positive	normal	decreased	normal	normal	prolonged	normal	normal	normal	normal	normal	L4/5	paracentral	no herniation	compression	no compression	no herniation	no herniation
7	50	female	165	95	72	right	L5	impaired	normal	normal	absent	positive	normal	decreased	reduced	decreased	normal	absent	normal	prolonged	normal	normal	L4/5	central	no herniation	no compression	no compression	no herniation	no herniation
8	48	male	185	74	24	left	S1	normal	impaired	listing	absent	positive	normal	normal	normal	normal	normal	prolonged	normal	normal	normal	normal	L5/S1	no herniation	paracentral	no herniation	no herniation	compression	no compression
9	23	male	170	61	7	right	L5	impaired	normal	normal	normal	negative	normal	normal	normal	normal	absent	normal	normal	normal	prolonged	normal	L4/5 & L5/S1	diffuse	diffuse	compression	compression	compression	compression
10	46	male	182	72	3	left	S1	normal	impaired	listing	absent	positive	normal	normal	normal	normal	normal	normal	normal	normal	prolonged	normal	L5/S1	no herniation	paracentral	no herniation	no herniation	compression	no compression
11	28	male	186	92	48	right	S1	normal	impaired	normal	absent	negative	normal	normal	normal	normal	prolonged	prolonged	normal	normal	normal	normal	L4/5 & L5/S1	diffuse	paracentral	no compression	no compression	compression	no compression
12	46	male	183	116	4	left	L5	impaired	normal	antalgic	normal	positive	normal	normal	normal	normal	normal	normal	normal	normal	normal	normal	L4/5 & L5/S1	diffuse	paracentral	compression	compression	compression	compression
13	29	female	169	51	3	right	S1	normal	impaired	normal	normal	negative	normal	normal	normal	normal	normal	normal	normal	normal	normal	prolonged	L4/5 & L5/S1	paracentral	diffuse	compression	no compression	no compression	no compression
14	55	female	164	95	2	right	L5	impaired	normal	normal	normal	positive	normal	normal	normal	decreased	normal	normal	normal	normal	normal	normal	L4/5	diffuse	no herniation	compression	no compression	no herniation	no herniation
15	60	male	168	63	4	bilateral	S1	normal	impaired	normal	normal	positive	reduced	normal	normal	normal	normal	normal	normal	normal	prolonged	normal	L5/S1	no herniation	paracentral	no herniation	no herniation	compression	compression
16	52	female	159	71	4	left	S1	normal	impaired	antalgic	absent	positive	normal	normal	normal	normal	normal	absent	normal	normal	normal	normal	L4/5 & L5/S1	diffuse	paracentral	compression	no compression	compression	compression
17	30	male	178	83	12	left	L5	impaired	normal	normal	normal	negative	reduced	decreased	normal	normal	absent	absent	normal	normal	normal	normal	L4/5	diffuse	no herniation	no compression	no compression	no herniation	no herniation
18	23	male	175	68	2	left	S1	normal	impaired	antalgic	normal	positive	reduced	normal	normal	normal	normal	normal	normal	normal	normal	normal	L4/5	central	no herniation	no compression	no compression	no herniation	no herniation
19	24	male	173	62	3	left	S1	normal	impaired	antalgic	normal	positive	normal	normal	normal	normal	normal	normal	normal	normal	normal	normal	L4/5 & L5/S1	central	diffuse	compression	no compression	no compression	no compression
20	30	male	173	82	1	left	L5	impaired	normal	normal	normal	positive	normal	normal	normal	normal	normal	normal	normal	normal	normal	normal	L4/5 & L5/S1	paracentral	diffuse	compression	no compression	no compression	no compression
21	34	male	168	77	24	left	L5	impaired	normal	normal	normal	positive	reduced	normal	normal	normal	absent	absent	normal	normal	normal	normal	L4/5 & L5/S1	diffuse	central	compression	no compression	no compression	no compression
22	44	female	161	75	36	right	L5 & S1	impaired	impaired	antalgic	absent	negative	normal	normal	normal	normal	absent	absent	prolonged	normal	prolonged	prolonged	L4/5 & L5/S1	central	central	compression	compression	compression	compression
23	50	female	161	71	8	left	L5	impaired	normal	antalgic	normal	positive	normal	normal	normal	normal	normal	normal	normal	normal	normal	normal	L4/5	central	no herniation	compression	no compression	no herniation	no herniation
24	29	male	184	91	24	bilateral	S1	normal	impaired	normal	normal	negative	normal	normal	normal	decreased	absent	normal	prolonged	normal	normal	normal	L4/5 & L5/S1	diffuse	diffuse	no compression	no compression	no compression	no compression
25	40	male	172	70	2	left	L5	impaired	normal	listing	absent	positive	reduced	normal	normal	normal	prolonged	prolonged	normal	normal	prolonged	prolonged	L4/5	central	no herniation	compression	no compression	no herniation	no herniation
26	36	male	178	75	6	left	S1	normal	impaired	normal	normal	negative	normal	normal	normal	normal	normal	abscent	normal	normal	prolonged	normal	L4/5 & L5/S1	diffuse	diffuse	no compression	no compression	no compression	no compression
27	37	male	167	65	24	left	S1	normal	impaired	normal	normal	negative	normal	normal	normal	normal	normal	normal	normal	normal	normal	normal	L5/S1	no herniation	paracentral	no herniation	no herniation	compression	no compression
28	33	female	168	68	120	left	S1	normal	impaired	normal	normal	negative	normal	normal	normal	normal	absent	abscent	normal	normal	normal	normal	L5/S1	no herniation	diffuse	no herniation	no herniation	no compression	no compression
29	40	female	172	79	24	left	S1	normal	impaired	normal	normal	negative	normal	normal	normal	normal	normal	normal	normal	normal	normal	normal	L5/S1	no herniation	paracentral	no herniation	no herniation	compression	no compression
30	53	male	179	84	24	left	S1	normal	impaired	listing	normal	negative	normal	normal	normal	normal	normal	absent	normal	normal	prolonged	prolonged	L4/5	paracentral	no herniation	compression	no compression	no herniation	no herniation
CP a	common peroneal nerve CMAP amplitude
Cp v	common peroneal nerve CMAP velocity
T a	Tibial nerve CMAP amplitude
Tv	Tibial nerve CMAP velocity
F-CP aff	common peroneal nerve F-wave mean latency, recorded from symptomatic side
F-CP non	common peroneal nerve F-wave mean latency, recorded from asymptomatic side
F-T aff	Tibial nerve F-wave mean latency, recorded from symptomatic side
F-T non	Tibial nerve F-wave mean latency, recorded from asymptomatic side
H aff	H-reflex latency recorded from symtomatic side
H non	H-reflex latency recorded from asymtomatic side
MRI root comp. L4/5 aff		nerve root compression at L4/5 level detected on symtomatic side
MRI root comp. L4/5 non		nerve root compression at L4/5 level detected on asymtomatic side
MRI root comp. L5/S1 aff		nerve root compression at L5/S1 level detected on symtomatic side
MRI root comp. L5/S1 non		nerve root compression at L5/S1 level detected on asymtomatic side
